# Supplementary material
Source: PubMed Central journal article supplement (PMC2397541)
Supplement: NIHMS1787-supplement-Supptab1.pdf [file NIHMS1787-supplement-Supptab1.pdf]

### Supplementary table 1: Primer and siRNA oligonucleotide sequences

#### Primers used for PCNT PCR and Sequencing

| Exon |   | Primer sequence        | PCR conditions<br>Faststart Taq (Roche) |
|------|---|------------------------|-----------------------------------------|
| 4    | F | AGGACGTGCGTCGTCAGTTC   | 54°C / 40 cycles                        |
|      | R | AAAGGAGATGGCAGCGCCC    |                                         |
| 12   | F | AGCAGGAAACACCTTTGAGGG  | 54°C / 40 cycles                        |
|      | R | TTCACGGAGGACTTGGATCG   |                                         |
| 18   | F | CGAGGTGTGCAAACCTGGTGG  | 60°C / 35 cycles                        |
|      | R | CCAATACGGAGGCTCCTCTCAG |                                         |
|      |   |                        |                                         |

#### siRNA oligonucleotide sequences

##### PCNT (exon 3)

|             |                           |
|-------------|---------------------------|
| sense:      | UCACAAUCAGUGACCACCAACCGGA |
| anti-sense: | UCCGGUUGGUGGUCACUGAUUGUGA |
